# Supplementary material
Source: PubMed Central journal article supplement (PMC4143171)
Supplement: NIHMS622068-supplement-01.pdf [file NIHMS622068-supplement-01.pdf]

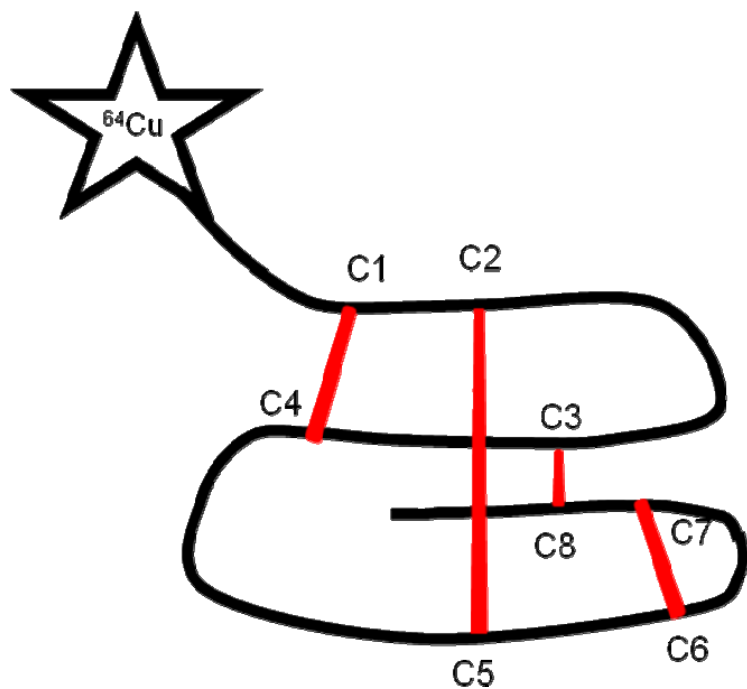

**Supplemental Figure 1.** Cartoon representation of the AgRP cystine-knot protein used for molecular probe development.

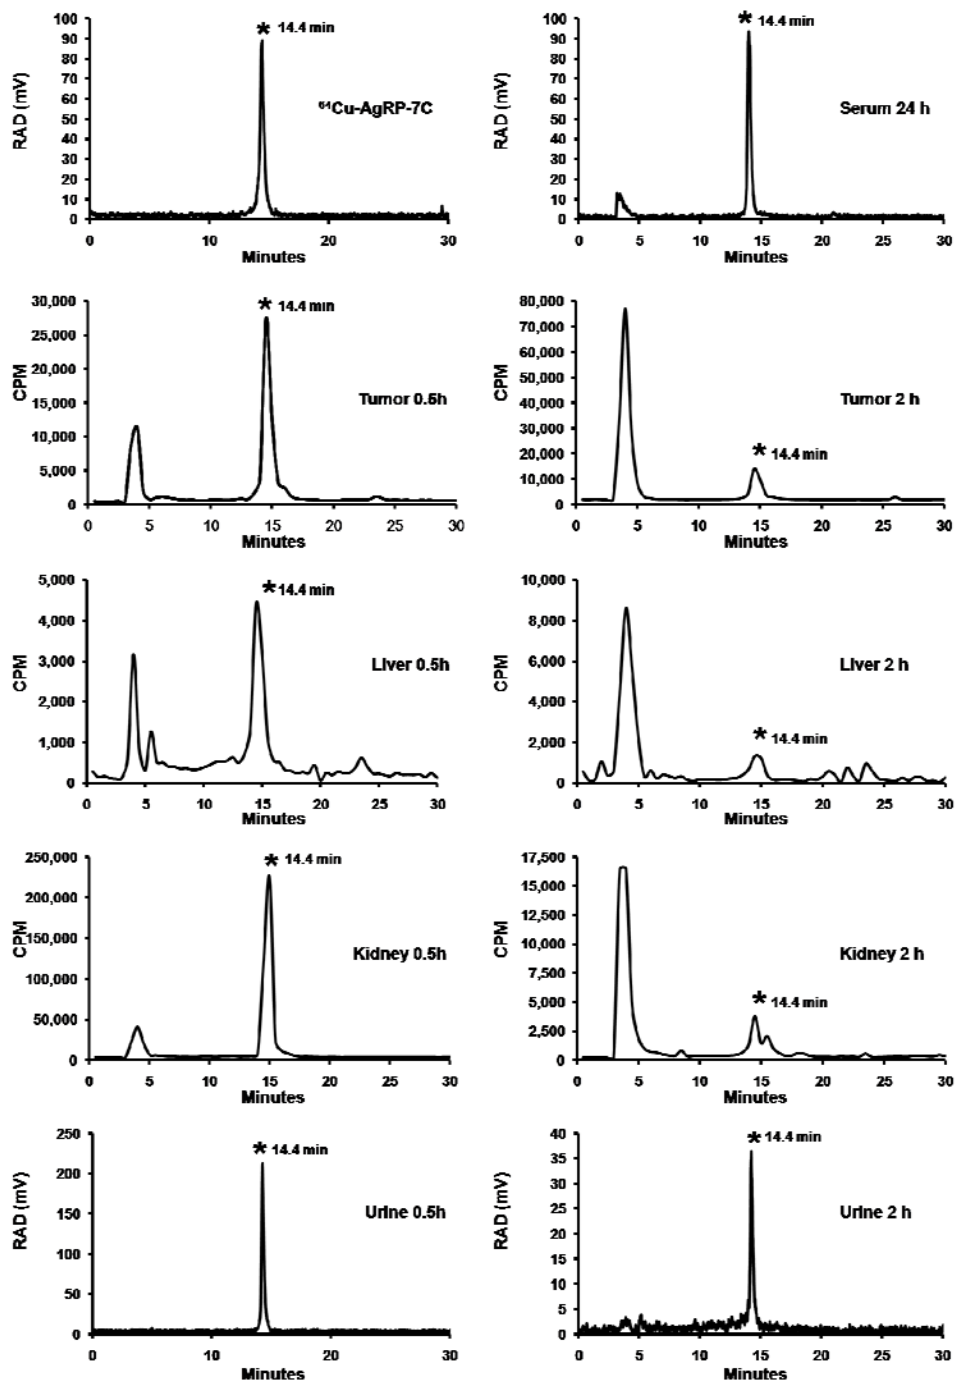

**Supplemental Figure 2.** Serum stability and *in vivo* metabolite analysis of  $^{64}\text{Cu}$ -DOTA-AgRP-7C. HPLC radiochromatograms of intact  $^{64}\text{Cu}$ -DOTA-AgRP-7C probe, and probe after incubation with mouse serum at 37 °C for 24 h. Homogenized tissues were analyzed by radio-HPLC and  $\gamma$  counting at 0.5 and 2 h post injection.
